# Supplementary material for: Untargeted Metabolomics Profiling of Bioactive Compounds under Varying Digestate Storage Conditions: Assessment of Antioxidant and Antifungal Activity
Source: Int J Environ Res Public Health. 2022 Apr 18;19(8):4923. doi: 10.3390/ijerph19084923 (PMC9027003; doi:10.3390/ijerph19084923)
Supplement: Supplementary file 1 [file ijerph-19-04923-s001.zip › ijerph-1655463-supplementary.pdf]

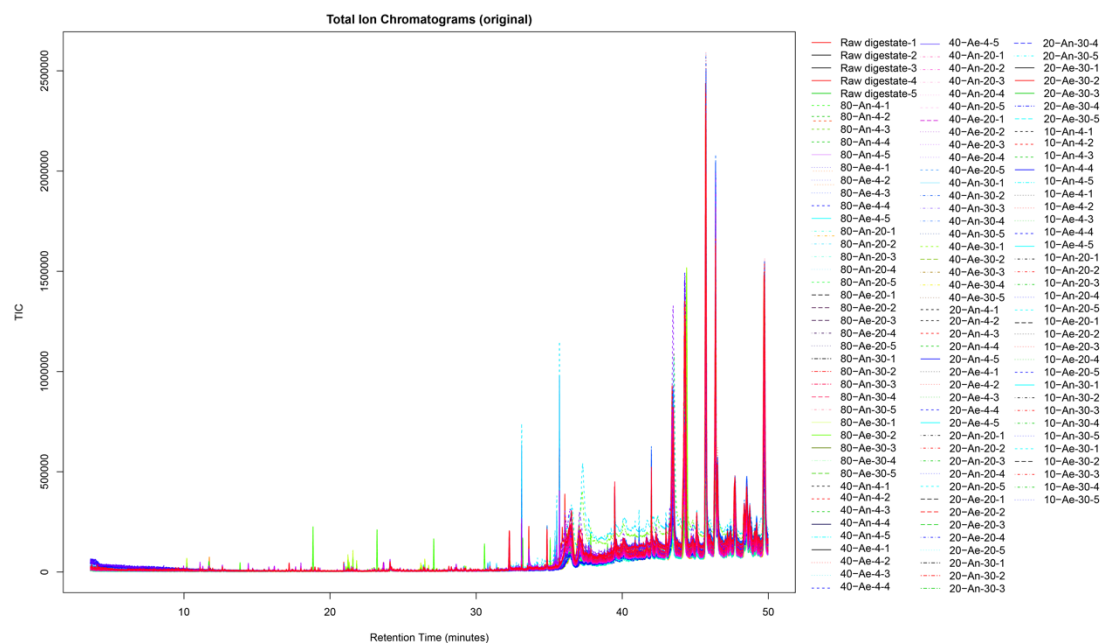

**Figure S1.** The calibration procedure used for visualization and quality control, including an overlay of all total ion chromatograms acquired before Rt. Calibration.

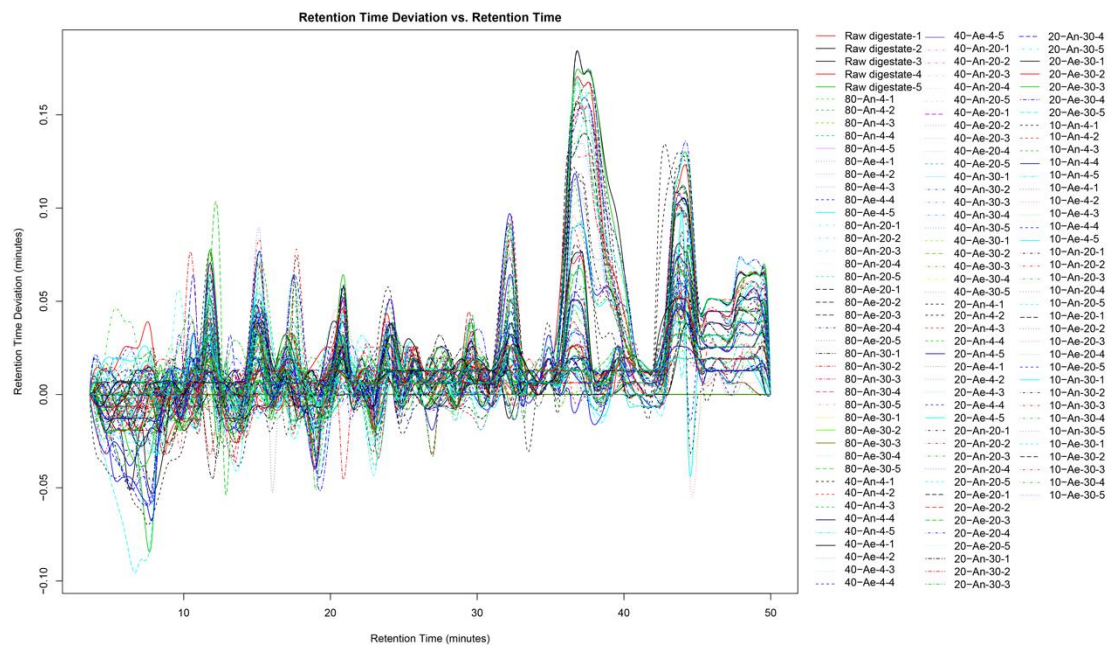

**Figure S2.** The calibration procedure used for visualization and quality control, including an overlay of all total ion chromatograms acquired after Rt. Calibration.

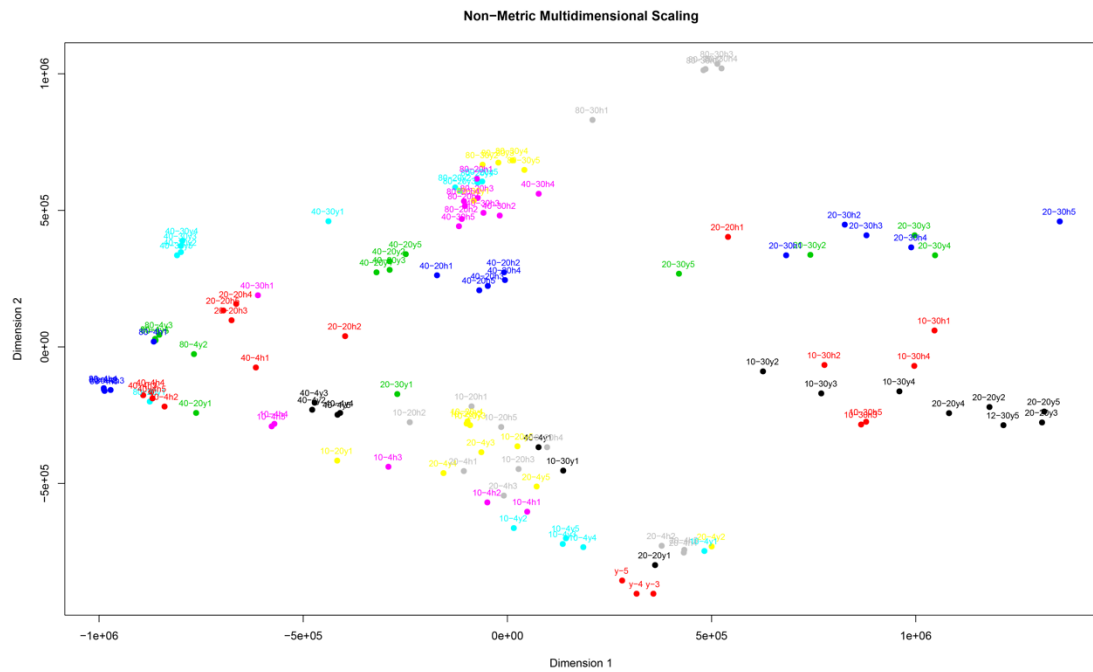

**Figure S3.** Non-Metric Multidimensional Scaling (NMDS) biplot.
